# Supplementary material
Source: publisher figshare collection journal article supplement (https://frontiersin.figshare.com/ndownloader/files/33077483)
Supplement: Supplementary file [file 33077483]

**Table S1.** Cell surface expression data for SNAP-tagged CLR ICL1 mutants, co-expressed with RAMP1, as determined via ELISA. Data represented as percentage expression of wild type CLR. n=minimum of 3 triplicate repeats.

|                | Y165       | F166       | K167     | S168     | WT Residue<br>L169 | S170      | C171     | Q172   |
|----------------|------------|------------|----------|----------|--------------------|-----------|----------|--------|
| <b>Ala/Leu</b> | 121.6±11.7 | 110.4± 6.5 | 55.0±3.7 | 89.6±8.4 | 36.2±2.9           | 101.6±7.2 | 79.1±7.2 | 78±2.3 |

**Table S2.** Cell surface expression data for SNAP-tagged CLR H8 mutants, co-expressed with RAMP1, as determined via ELISA. Data represented as percentage expression of wild type CLR. Residues changed to Ala except for A393 where Leu was introduced. n=minimum of 3 triplicate repeats.

|                | N388   | G389    | E390     | V391      | Q392       | WT Residue<br>A393 | I394   | L395      | R396     | I397   | L398     | R399     |
|----------------|--------|---------|----------|-----------|------------|--------------------|--------|-----------|----------|--------|----------|----------|
| <b>Ala/Leu</b> | 96±4.5 | 101±6.5 | 51.2±8.8 | 93.4±10.5 | 104.3±12.2 | 96±3.4             | 20±5.6 | 51.34±9.1 | 82.3±2.3 | 48±2.4 | 56.1±7.5 | 50.15±18 |

**Table S3a:** Potency (pEC<sub>50</sub>) for cAMP production in HEK 293 cells, co-expressing RAMP 1 and alanine CLR ICL1 mutants, and H8 mutants upon CGRP stimulation, normalised with respect to WT CLR.

| <b>ICL1</b>  |                                     |                                    |                 |
|--------------|-------------------------------------|------------------------------------|-----------------|
|              | <b>pEC<sub>50</sub><sup>a</sup></b> | <b>E<sub>max</sub><sup>b</sup></b> | <b><i>n</i></b> |
| <b>WT</b>    | 8.90±0.2                            | 102.1±6.4                          | 10              |
| <b>Y165A</b> | 8.48±0.2                            | 104.7±4.0                          | 6               |
| <b>F166A</b> | 8.12±0.3                            | 62.9±8.2**                         | 6               |
| <b>K167A</b> | 8.85±0.2                            | 122.6±6.6                          | 6               |
| <b>S168A</b> | 8.78±0.2                            | 115.9±7.9                          | 6               |
| <b>L169A</b> | 8.44±0.2                            | 69.9±6.2*                          | 6               |
| <b>S170A</b> | 8.85±0.2                            | 129.8±8.3*                         | 6               |
| <b>C171A</b> | 7.68±0.4**                          | 86.2±10.5                          | 8               |
| <b>Q172A</b> | 8.35±0.2                            | 68.5±5.7*                          | 8               |
| <b>R173A</b> | 7.84±0.3**                          | 63.1±6.4**                         | 8               |

| <b>Helix 8</b> |                                     |                                    |                 |
|----------------|-------------------------------------|------------------------------------|-----------------|
|                | <b>pEC<sub>50</sub><sup>a</sup></b> | <b>E<sub>max</sub><sup>b</sup></b> | <b><i>n</i></b> |
| <b>WT</b>      | 8.34±0.1                            | 99.8±1.4                           | 6               |
| <b>N388A</b>   | 7.23±0.10**                         | 110.7±5.6                          | 5               |
| <b>G389A</b>   | 8.19±0.12                           | 101.5±2.5                          | 6               |
| <b>E390A</b>   | 7.71±0.2*                           | 64.1±2.2*                          | 6               |
| <b>V391A</b>   | 7.52±0.1*                           | 89.8±2.8                           | 10              |
| <b>Q392A</b>   | 8.58±0.1                            | 105.8±2.5                          | 3               |
| <b>A393L</b>   | 8.59±0.1                            | 99.9±2.3                           | 4               |
| <b>I394A</b>   | 8.23±0.2                            | 94.9±4.4                           | 4               |
| <b>L395A</b>   | 7.72±0.1*                           | 100.1±2.9                          | 4               |
| <b>R396A</b>   | 8.36±0.1                            | 105.4±3.3                          | 4               |
| <b>R397A</b>   | 8.05±0.1                            | 44.6±3.8**                         | 4               |
| <b>N398A</b>   | 8.18±0.1                            | 91.4±2.5                           | 4               |
| <b>W399A</b>   | 7.74±0.1*                           | 90.1±3.7                           | 4               |

Data ± SEM of *n* individual replicates.

<sup>a</sup> Negative logarithm of agonist concentration producing half-maximal response.

<sup>b</sup> Maximal response observed upon CGRP stimulation, as a percentage of that observed for wild type CLR.

Statistical difference between each mutant and wild type CLR was calculated using a one-way ANOVA with Dunnett's post-test (\*, *p* < 0.05, \*\*, *p* < 0.01, \*\*\*, *p* < 0.001, \*\*\*\*, *p* < 0.0001).

**Table S3b:** Affinity (pKa) and coupling efficacy (log  $\tau$ ) values for cAMP production in HEK 293 cells, co-expressing RAMP 1 and alanine CLR ICL1 mutants, and H8 mutants upon CGRP stimulation, normalised with respect to 100 $\mu$ M forskolin stimulation.

| <u>ICL1</u>  |             |                  |               |          |
|--------------|-------------|------------------|---------------|----------|
|              | $E_{max}^a$ | pKa <sup>b</sup> | log $\tau^c$  | <i>n</i> |
| <b>WT</b>    | 38.92±2.4   | 8.69±0.2         | -0.19±0.02    | 10       |
| <b>Y165A</b> | 50.78±1.9   | 8.81±0.2         | -0.09±0.03*   | 6        |
| <b>F166A</b> | 29.47±1.4*  | 8.54±0.3         | -0.42±0.02*** | 6        |
| <b>K167A</b> | 43.90±1.7   | 8.72±0.2         | -0.14±0.02    | 6        |
| <b>S168A</b> | 43.37±2.5   | 8.17±0.2         | -0.11±0.04    | 6        |
| <b>L169A</b> | 24.39±1.4*  | 8.13±0.3         | -0.50±0.03**  | 6        |
| <b>S170A</b> | 55.25±6.4*  | 8.00±0.2         | -0.082±0.03*  | 6        |
| <b>C171A</b> | 31.23±2.1   | 7.57±0.3**       | -0.35±0.03*** | 8        |
| <b>Q172A</b> | 27.28±1.7*  | 8.09±0.3         | -0.42±0.02*** | 8        |

  

| <u>Helix 8</u> |             |                  |              |          |
|----------------|-------------|------------------|--------------|----------|
|                | $E_{max}^a$ | pKa <sup>b</sup> | Log $\tau^c$ | <i>n</i> |
| <b>WT</b>      | 50.0±0.7    | 8.39±0.1         | -0.17±0.03   | 6        |
| <b>N388A</b>   | 55.35±2.8   | 7.13±0.3**       | -0.58±0.03** | 6        |
| <b>G389A</b>   | 50.5±1.2    | 8.45±0.2         | -0.19±0.01   | 6        |
| <b>E390A</b>   | 32.2±1.1*   | 7.72±0.2*        | -0.42±0.04*  | 6        |
| <b>V391A</b>   | 35.0±1.4*   | 7.76±0.1*        | -0.23±0.03   | 10       |
| <b>Q392A</b>   | 52.4±1.3    | 8.62±0.1         | -0.09±0.04   | 3        |
| <b>A393L</b>   | 50.0±1.2    | 8.41±0.1         | -0.12±0.02   | 4        |
| <b>I394A</b>   | 47.45±2.2   | 8.38±0.1         | -0.18±0.03   | 4        |
| <b>L395A</b>   | 50.0±1.5    | 7.55±0.1*        | -0.12±0.03   | 4        |
| <b>R396A</b>   | 52.2±1.8    | 8.24±0.1         | -0.08±0.04   | 4        |
| <b>R397A</b>   | 23.45±4.4*  | 7.96±0.1         | -0.17±0.04   | 4        |
| <b>N398A</b>   | 46.00±1.3   | 8.05±0.1         | -0.08±0.03   | 4        |
| <b>W399A</b>   | 45.05±1.8   | 7.60±0.1*        | -0.16±0.03   | 4        |

Data  $\pm$  SEM of *n* individual replicates.

<sup>a</sup> Maximal response observed upon CGRP stimulation, as a percentage of that observed for 100 $\mu$ M forskolin stimulation

<sup>b</sup> Negative logarithm of the equilibrium dissociation constant, as determined using the operational model of agonism (Black and Leff, 1983).

<sup>c</sup> Coupling efficacy parameter as determined using the operational model of agonism (Black and Leff, 1983).

Statistical difference between each mutant and wild type CLR was calculated using a one-way ANOVA with Dunnett's post-test (\*,  $p < 0.05$ , \*\*,  $p < 0.01$ , \*\*\*,  $p < 0.001$ ).

**Table S4:**

Potency (pEC<sub>50</sub>), affinity (pKa) and coupling efficacy (log  $\tau$ ) values for  $i$ Ca<sup>2+</sup> mobilization in HEK 293 cells, co-expressing RAMP 1 and alanine CLR ICL 1 mutants, and H8 mutants upon CGRP stimulation.

| <u>ICL1</u>    |                                |                               |                  |                         |          |
|----------------|--------------------------------|-------------------------------|------------------|-------------------------|----------|
|                | pEC <sub>50</sub> <sup>a</sup> | E <sub>max</sub> <sup>b</sup> | pKa <sup>c</sup> | log $\tau$ <sup>d</sup> | <i>n</i> |
| <b>WT</b>      | 9.07±0.2                       | 33.1±2.8                      | 8.85±0.2         | -0.33±0.04              | 3        |
| <b>Y165A</b>   | 9.49±0.3                       | 33.1±2.3                      | 9.38±0.1         | -0.28±0.03              | 3        |
| <b>F166A</b>   | 9.03±0.3                       | 33.5±3.7                      | 8.76±0.2         | 0.32±0.05               | 3        |
| <b>K167A</b>   | 9.81±0.1*                      | 27.6±2.0                      | 9.61±0.1*        | -0.43±0.03              | 3        |
| <b>S168A</b>   | 8.18±0.3*                      | 21.6±4.0*                     | 8.03±0.2*        | -0.60±0.5*              | 3        |
| <b>L169A</b>   | 6.45±1.0***                    | 40.2±15.0                     | 6.03±0.1***      | 0.21±0.03**             | 3        |
| <b>S170A</b>   | 7.22±0.7**                     | 35.1±9.8                      | 6.95±0.3***      | -0.31±0.1               | 3        |
| <b>C171A</b>   | 6.11±1.2***                    | 59.4±17.5**                   | 6.18±0.2***      | 0.18±0.04**             | 3        |
| <b>Q172A</b>   | 8.07±0.5**                     | 12.3±2.0**                    | 8.10±0.2**       | -0.85±0.04*             | 3        |
| <u>Helix 8</u> |                                |                               |                  |                         |          |
|                | pEC <sub>50</sub> <sup>a</sup> | E <sub>max</sub> <sup>b</sup> | pKa <sup>c</sup> | Log $\tau$ <sup>d</sup> | <i>n</i> |
| <b>WT</b>      | 9.07±0.02                      | 49.0±2.6                      | 8.84±0.2         | -0.31±0.04              | 7        |
| <b>E390A</b>   | 7.52±0.2***                    | 59.5±3.8*                     | 7.34±0.2***      | -0.12±0.08              | 8        |
| <b>V391A</b>   | 8.81±0.2**                     | 51.0±2.9                      | 8.66±0.2         | -0.28±0.04              | 8        |
| <b>Q392A</b>   | 9.11±0.2                       | 50.0±2.8                      | 8.91±0.1         | -0.27±0.04              | 8        |
| <b>A393L</b>   | 9.40±0.2                       | 49.7±2.03                     | 9.20±0.1         | -0.30±0.03              | 8        |
| <b>I394A</b>   | N.R.                           | N.R.                          | N.R.             | N.R.                    | 4        |
| <b>L395A</b>   | 8.90±0.4                       | 43.6±4.6                      | 8.73±0.3         | -0.42±0.08              | 8        |
| <b>R396A</b>   | 8.40±0.2**                     | 56.8±2.8                      | 8.21±0.1*        | -0.19±0.04*             | 8        |
| <b>R397A</b>   | 9.22±0.2                       | 44.7±3.0                      | 9.06±0.2         | -0.35±0.05              | 8        |
| <b>N398A</b>   | 8.52±0.2*                      | 45.0±2.2                      | 8.40±0.2*        | -0.33±0.04              | 8        |
| <b>W399A</b>   | 8.91±0.1                       | 45.5±1.5                      | 8.75±0.1         | -0.36±0.02              | 8        |

Data ± SEM of *n* individual replicates.

<sup>a</sup> Negative logarithm of agonist concentration producing half-maximal response.

<sup>b</sup> Maximal response observed upon stimulation with 100  $\mu$ M ionomycin

<sup>c</sup> Negative logarithm of the equilibrium dissociation constant, as determined using the operational model of agonism (Black and Leff, 1983).

<sup>d</sup> Coupling efficacy parameter as determined using the operational model of agonism (Black and Leff, 1983).

Statistical difference between each mutant and wild type CLR was calculated using a one-way ANOVA with Dunnett's post-test (\*, *p* < 0.05, \*\*, *p* < 0.01, \*\*\*, *p* < 0.001).

N.R. denotes no detectable response.

**Table S5:** Potency ( $pEC_{50}$ ), affinity ( $pKa$ ) and coupling efficacy ( $\log \tau$ ) values for ERK1/2 activation in HEK 293 cells, co-expressing RAMP 1 and alanine CLR ICL 1 mutants (A), and H8 mutants (B) upon CGRP stimulation.

| <u>ICL1</u>  |              |             |            |               |     |
|--------------|--------------|-------------|------------|---------------|-----|
|              | $pEC_{50}^a$ | $E_{max}^b$ | $pKa^c$    | $\log \tau^d$ | $n$ |
| <b>WT</b>    | 7.35±0.3     | 26.7±5.1    | 6.49±0.4   | -0.0037±0.1   | 3   |
| <b>Y165A</b> | 7.67±0.4     | 13.6±3.1*   | 7.68±0.5*  | -0.70±0.1**   | 3   |
| <b>F166A</b> | 7.82±0.3     | 19.6±3.1*   | 7.68±0.3*  | -0.56±0.08**  | 3   |
| <b>K167A</b> | 8.10±0.3**   | 17.7±2.8*   | 8.00±0.3** | -0.59±0.08**  | 3   |
| <b>S168A</b> | 6.82±0.4*    | 30.6±7.5    | 6.78±0.4   | -0.35±0.2*    | 3   |
| <b>L169A</b> | 6.71±0.3     | 29.6±6.5    | 6.51±0.3   | -0.32±0.1*    | 3   |
| <b>S170A</b> | 6.64±0.6*    | 34.8±13.9   | 6.44±0.6   | -0.24±0.3*    | 3   |
| <b>C171A</b> | 7.00±0.5     | 32.5±9.3    | 6.78±0.6   | -0.35±0.2*    | 3   |
| <b>Q172A</b> | 6.84±0.3*    | 33.8±5.7    | 6.69±0.3   | -0.27±0.1*    | 3   |

  

| <u>Helix 8</u> |              |             |             |               |     |
|----------------|--------------|-------------|-------------|---------------|-----|
|                | $pEC_{50}^a$ | $E_{max}^b$ | $pKa^c$     | $\log \tau^d$ | $n$ |
| <b>WT</b>      | 7.26±0.1     | 45.5±1.9    | 6.96±0.1    | 0.0042±0.04   | 5   |
| <b>E390A</b>   | 8.92±0.2***  | 40.1±1.9    | 8.67±0.2*** | -0.10±0.05*   | 5   |
| <b>V391A</b>   | 8.41±0.3**   | 34.7±2.5*   | 8.20±0.3**  | -0.19±0.05*   | 5   |
| <b>Q392A</b>   | 8.17±0.1***  | 30.8±1.09** | 7.99±0.1*** | -0.28±0.03*** | 5   |
| <b>A393L</b>   | 7.22±0.1     | 40.5±2.3    | 6.96±0.2    | -0.089±0.05*  | 5   |
| <b>I394A</b>   | N.R.         | N.R.        | N.R.        | N.R.          | 4   |
| <b>L395A</b>   | 7.43±0.3     | 26.5±2.4**  | 7.29±0.3    | -0.40±0.06*** | 5   |
| <b>R396A</b>   | 5.30±0.6***  | 28.6±14.3** | 5.14±0.7*   | -0.33±0.30*   | 5   |
| <b>R397A</b>   | 5.46±0.4***  | 27.6±7.2**  | 5.29±0.4**  | -0.34±0.20*   | 5   |
| <b>N398A</b>   | 7.38±0.2     | 16.3±1.2*** | 7.30±0.2    | -0.70±0.05*** | 5   |
| <b>W399A</b>   | 6.12±0.2***  | 22.0±2.0*   | 6.00±0.2**  | -0.48±0.05*** | 5   |

Data ± SEM of  $n$  individual replicates.

<sup>a</sup> Negative logarithm of agonist concentration producing half-maximal response.

<sup>b</sup> Maximal response observed upon stimulation with 100  $\mu$ M PMA

<sup>c</sup> Negative logarithm of the equilibrium dissociation constant, as determined using the operational model of agonism (Black and Leff, 1983).

<sup>d</sup> Coupling efficacy parameter as determined using the operational model of agonism (Black and Leff, 1983).

Statistical difference between each mutant and wild type CLR was calculated using a one-way ANOVA with Dunnett's post-test (\*,  $p < 0.05$ , \*\*,  $p < 0.01$ , \*\*\*,  $p < 0.001$ ).

N.R. denotes no detectable response.

**Table S6:** Potency (pEC<sub>50</sub>), affinity (pKa) and coupling efficacy (log  $\tau$ ) values for cAMP,  $i$ Ca<sup>2+</sup> and ERK1/2 activation in HEK 293 cells, expressing alanine GCGR ICL1 mutants upon GCG stimulation.

|              | <b>cAMP</b>                         |                                    |                        |                                         |          |
|--------------|-------------------------------------|------------------------------------|------------------------|-----------------------------------------|----------|
|              | <b>pEC<sub>50</sub><sup>a</sup></b> | <b>E<sub>max</sub><sup>b</sup></b> | <b>pKa<sup>c</sup></b> | <b>log<math>\tau</math><sup>d</sup></b> | <b>n</b> |
| <b>WT</b>    | 9.94±0.2                            | 44.2±2.2                           | 9.83±0.1               | -0.14±0.003                             | 3        |
| <b>G165A</b> | 9.82±0.3                            | 39.4±2.8                           | 9.61±0.1               | -0.22±0.004                             | 3        |
| <b>L166A</b> | 10.3±0.2                            | 40.8±1.9                           | 10.1±0.1               | -0.2±0.004                              | 3        |
| <b>S167A</b> | 9.77±0.2                            | 41.9±0.16                          | 9.73±0.2               | -0.19±0.004                             | 3        |
| <b>K168A</b> | 9.92±0.2                            | 45.1±2.6                           | 9.69±0.2               | -0.12±0.005                             | 3        |
| <b>L169A</b> | 9.71±0.3                            | 24.6±2.0**                         | 9.55±0.3               | -0.54±0.005                             | 3        |
| <b>H170A</b> | 9.83±0.2                            | 45.3±2.3                           | 9.71±0.3               | -0.12±0.005                             | 3        |
| <b>C171A</b> | N.R.                                | N.R.                               | N.R.                   | N.R.                                    | 3        |
| <b>T172A</b> | 9.93±0.3                            | 29.9±2.3*                          | 10.2±0.2               | -0.44±0.004                             | 3        |

  

|              | <b><math>i</math>Ca<sup>2+</sup></b> |                                    |                        |                                         |          |
|--------------|--------------------------------------|------------------------------------|------------------------|-----------------------------------------|----------|
|              | <b>pEC<sub>50</sub><sup>a</sup></b>  | <b>E<sub>max</sub><sup>e</sup></b> | <b>pKa<sup>c</sup></b> | <b>log<math>\tau</math><sup>d</sup></b> | <b>n</b> |
| <b>WT</b>    | 6.5±0.24                             | 48.8±4.9                           | 6.21±0.1               | -0.056±0.05                             | 3        |
| <b>G165A</b> | 6.66±0.2                             | 41.2±2.8                           | 6.51±0.2               | -0.197±0.06                             | 3        |
| <b>L166A</b> | 6.3±0.2                              | 41.6±2.9                           | 6.20±0.2               | -0.188±0.09                             | 3        |
| <b>S167A</b> | 6.54±0.3                             | 33.3±3.6*                          | 6.42±0.3               | -0.352±0.09**                           | 3        |
| <b>K168A</b> | 6.49±0.4                             | 22.7±3.0**                         | 6.40±1.3               | -0.607±0.24***                          | 3        |
| <b>L169A</b> | 6.43±0.2                             | 17.8±0.9**                         | 6.49±0.7               | -0.767±0.20***                          | 3        |
| <b>H170A</b> | 6.21±0.3                             | 21.7±2.4**                         | 6.19±1.0               | -0.638±0.22***                          | 3        |
| <b>C171A</b> | N.R.                                 | N.R.                               | N.R.                   | N.R.                                    | 3        |
| <b>T172A</b> | 6.34±0.4                             | 25.3±3.6**                         | 6.17±0.6               | -0.537±0.15***                          | 3        |

|              | <b>ERK1/2</b>                       |                                    |                        |                         |          |
|--------------|-------------------------------------|------------------------------------|------------------------|-------------------------|----------|
|              | <b>pEC<sub>50</sub><sup>a</sup></b> | <b>E<sub>max</sub><sup>f</sup></b> | <b>pKa<sup>c</sup></b> | <b>logτ<sup>d</sup></b> | <b>n</b> |
| <b>WT</b>    | 8.34±0.3                            | 92.8±11.1                          | 7.77±0.5               | -0.231±0.098            | 3        |
| <b>G165A</b> | 8.56±0.2                            | 92.9±7.2                           | 8.07±0.9               | -0.231±0.087            | 3        |
| <b>L166A</b> | 7.22±0.4**                          | 101.1±21                           | 6.16±1.0**             | -0.112±0.139            | 3        |
| <b>S167A</b> | 6.79±0.4**                          | 119.0±28*                          | 5.66±0.9**             | -0.062±0.148**          | 3        |
| <b>K168A</b> | 8.12±0.3                            | 86.4±7.7                           | 7.94±0.5               | -0.299±0.090            | 3        |
| <b>L169A</b> | 7.19±0.4**                          | 74.9±18                            | 6.26±0.8               | -0.295±0.198            | 3        |
| <b>H170A</b> | 7.20±0.3**                          | 101.1±10                           | 7.35±1.0               | -0.255±0.100            | 3        |
| <b>C171A</b> | N.R.                                | N.R.                               | N.R.                   | N.R.                    | 3        |
| <b>T172A</b> | 8.25±0.5                            | 50.4±10.7**                        | 7.94±0.6               | -0.615±0.133**          | 3        |

Data ± SEM of *n* individual replicates.

<sup>a</sup> Negative logarithm of agonist concentration producing half-maximal response.

<sup>b</sup> Maximal response observed upon stimulation with 100 μM Forskolin.

<sup>c</sup> Negative logarithm of the equilibrium dissociation constant, as determined using the operational model of agonism (Black and Leff, 1983).

<sup>d</sup> Coupling efficacy parameter as determined using the operational model of agonism (Black and Leff, 1983).

<sup>e</sup> Maximal response observed upon stimulation with 100 μM ionomycin.

<sup>f</sup> Maximal response observed upon stimulation with 100 μM PMA.

Statistical difference between each mutant and wild type GCGR was calculated using a one-way ANOVA with Dunnett's post-test (\*, *p* < 0.05, \*\*, *p* < 0.01, \*\*\*, *p* < 0.001).

N.R. denotes no detectable response.

**Table S7:** Potency ( $pEC_{50}$ ), affinity ( $pK_a$ ) and coupling efficacy ( $\log \tau$ ) values for cAMP,  $iCa^{2+}$  and ERK1/2 activation in HEK 293 cells, expressing CRFR1a and CRFR1b upon stimulation with CRF.

|               | <b>cAMP</b>                  |             |              |               | <i>n</i> |
|---------------|------------------------------|-------------|--------------|---------------|----------|
|               | $pEC_{50}^a$                 | $E_{max}^b$ | $pK_a^c$     | $\log \tau^d$ |          |
| <b>CRFR1a</b> | 7.66±0.2                     | 37.38±3.46  | 7.39±0.21    | -0.22±0.06    | 3        |
| <b>CRFR1b</b> | 7.76±0.24                    | 28.68±2.78  | 7.83±0.24    | -0.41±0.06    | 3        |
|               | <b><math>iCa^{2+}</math></b> |             |              |               |          |
| <b>CRFR1a</b> | 10.03±0.23                   | 53.82±3.7   | 9.70±0.23    | 0.06±0.08     | 3        |
| <b>CRFR1b</b> | 6.71±0.42***                 | 32.17±7.1*  | 6.57±0.47*** | -0.42±0.16*** | 3        |
|               | <b>ERK1/2</b>                |             |              |               |          |
| <b>CRFR1a</b> | 8.62±0.28                    | 29.63±1.89  | 8.53±0.28    | -0.67±0.06    | 3        |
| <b>CRFR1b</b> | 8.06±0.25                    | 24.81±2.32  | 8.00±0.26    | -0.62±0.07    | 3        |

Data ± SEM of *n* individual replicates.

<sup>a</sup> Negative logarithm of agonist concentration producing half-maximal response.

<sup>b</sup> Maximal response observed upon stimulation with 100 μM Forskolin (cAMP), 100 μM ionomycin ( $iCa^{2+}$ ) or 100 μM PMA (ERK1/2).

<sup>c</sup> Negative logarithm of the equilibrium dissociation constant, as determined using the operational model of agonism (Black and Leff, 1983).

<sup>d</sup> Coupling efficacy parameter as determined using the operational model of agonism (Black and Leff, 1983).

Statistical difference between CRFR1a and CRFR1b was calculated using a one-way ANOVA with Dunnett's post-test (\*,  $p < 0.05$ , \*\*,  $p < 0.01$ , \*\*\*,  $p < 0.001$ ).

**Figure S1:** Multiple sequence alignment of ICL1 (left) and H8 (right) of human Class B1 GPCRs

|             |                             |                                 |
|-------------|-----------------------------|---------------------------------|
| CALRL_HUMAN | YFK <sup>12.48</sup> SLSCQR | NGE <sup>8.49b</sup> VQAILRRNW  |
| CALCR_HUMAN | FFR <sup>12.48</sup> KLGCQR | NEV <sup>8.49b</sup> QTTVKRQYW  |
| CRFR1_HUMAN | RLR <sup>12.48</sup> SIRCLR | NSE <sup>8.49b</sup> VRSAIRKRW  |
| GCGR_HUMAN  | GLS <sup>12.48</sup> KLHCTR | NKE <sup>8.49b</sup> VQSELRRRW  |
| GLP1R_HUMAN | GFR <sup>12.48</sup> HLHCTR | NEV <sup>8.49b</sup> QLEFRKSRW  |
| GLP2R_HUMAN | FLR <sup>12.48</sup> KLHCTR | NGE <sup>8.49b</sup> VKAELRKYW  |
| GIPR_HUMAN  | LFR <sup>12.48</sup> RLHCTR | NKE <sup>8.49b</sup> VQSEIRRGW  |
| VIPR1_HUMAN | LFR <sup>12.48</sup> KLHCTR | NGE <sup>8.49b</sup> VQAE LRKRW |
| PACR_HUMAN  | RFR <sup>12.48</sup> KLHCTR | NGE <sup>8.49b</sup> VQAEIKRKW  |
| VIPR2_HUMAN | LFR <sup>12.48</sup> KLHCTR | NSE <sup>8.49b</sup> VQCELKRW   |
| SCTR_HUMAN  | AFR <sup>12.48</sup> RLHCTR | NGE <sup>8.49b</sup> VQLEVQKKW  |
| PTH2R_HUMAN | YFR <sup>12.48</sup> RLHCTR | NGE <sup>8.49b</sup> VQAEVKKMW  |
| GHRHR_HUMAN | ALR <sup>12.48</sup> RLHCPR | NQE <sup>8.49b</sup> VRTEISRKW  |
| PTH1R_HUMAN | YFR <sup>12.48</sup> RLHCTR | NGE <sup>8.49b</sup> VQAEIKKSW  |

Multiple sequence alignment (left) of ICL1 and flanking residues and H8 and its junction with helix 7 for human family B GPCRs. The start of ICL1 at 12.48 and H8 at 8.49b are marked.

**Supplementary Video 1.** Molecular dynamics simulation of the CLR during inactive to active transition: a) view of the cytoplasmic surface, ICL1 is in orange at the bottom right; b) view of the TM bundle. The side chains are S12.49, L12.50, C2.44, R2.46, N3887.61b and E3908.49, as in Fig 8A.

**Supplementary Video 2.** Molecular dynamics simulation of the GCGR during inactive to active transition: a) view of the cytoplasmic surface; ICL1 is in orange at the bottom right; b) view of the TM bundle.
